# Supplementary material for: Colonisation and mass rearing: learning from others
Source: PubMed Central journal article supplement (PMC2777326; doi:10.1186/1475-2875-8-s2-s4), 2009-11-16
Supplement: 1475-2875-8-S2-S4-S1.pdf [file 1475-2875-8-S2-S4-S1.pdf]

**Status of colonization of major anophelines.**

| <b>Species (<u>major vectors according to WHO underlined</u>)</b> | <b>Region</b>       | <b>Mating Status<sup>1</sup></b> |
|-------------------------------------------------------------------|---------------------|----------------------------------|
| <i>An. aconitus</i>                                               | South Pacific       | colonized                        |
| <u><i>An. albimanus</i></u>                                       | Americas            | S                                |
| <i>An. albitarsis</i>                                             | Americas            | F/S                              |
| <u><i>An. annularis</i></u>                                       | Indian subcontinent | F/S                              |
| <i>An. anthropophagus</i>                                         | Asia                | colonized                        |
| <u><i>An. aquasalis</i></u>                                       | Americas            | S                                |
| <u><i>An. arabiensis</i></u>                                      | Africa              | S                                |
| <i>An. argyritarsis</i>                                           | Americas            | no colony                        |
| <u><i>An. atroparvus</i></u>                                      | Europe              | S                                |
| <i>An. aztecus</i>                                                | Americas            | colonized                        |
| <i>An. balabacensis ss</i>                                        | Southeast Asia      | F                                |
| <i>An. balabacensis sl</i>                                        | Southeast Asia      | F                                |
| <i>An. bancroftii</i>                                             | South Pacific       | no colony                        |
| <i>An. bellator</i>                                               | Americas            | no colony                        |
| <i>An. braziliensis</i>                                           | Americas            | no colony                        |
| <i>An. bwambae</i>                                                | Africa              | S                                |
| <i>An. campestris</i>                                             | Southeast Asia      | colonized                        |
| <i>An. claviger</i>                                               | Mediterranean       | no colony                        |
| <i>An. cruzii</i>                                                 | Americas            | no colony                        |
| <u><i>An. culicifacies</i></u>                                    | Indian subcontinent | F/S                              |
| <i>An. daeneorum</i>                                              | Americas            | F                                |

|                            |                     |           |
|----------------------------|---------------------|-----------|
| <i>An. darlingi</i>        | Americas            | F         |
| <i>An. dirus</i>           | Southeast Asia      | F         |
| <i>An. donaldi</i>         | South Pacific       | no colony |
| <i>An. dravidicus</i>      | Southeast Asia      | no colony |
| <i>An. elegans</i>         | Indian subcontinent | F         |
| <i>An. farauti</i>         | South Pacific       | F/S       |
| <i>An. flavirostris</i>    | South Pacific       | no colony |
| <i>An. fluviatilis</i>     | Indian subcontinent | colonized |
| <i>An. freeborni ss</i>    | Americas            | S         |
| <i>An. funestus</i>        | Africa              | S         |
| <i>An. gambiae ss</i>      | Africa              | S         |
| <i>An. hackeri</i>         | Southeast Asia      | no colony |
| <i>An. hermsi</i>          | Americas            | S         |
| <i>An. hilli</i>           | South Pacific       | A         |
| <i>An. Hispaniola</i>      | Mediterranean       | no colony |
| <i>An. introlatus</i>      | Southeast Asia      | F         |
| <i>An. jeyporiensis</i>    | Indian subcontinent | no colony |
| <i>An. karwari</i>         | South Pacific       | no colony |
| <i>An. koliensis</i>       | South Pacific       | F         |
| <i>An. labranchiae</i>     | Mediterranean       | F         |
| <i>An. letifer</i>         | Southeast Asia      | F         |
| <i>An. leucosphyrus ss</i> | Southeast Asia      | F         |
| <i>An. ludlowae</i>        | Southeast Asia      | no colony |
| <i>An. maculates</i>       | Southeast Asia      | F/S       |

|                               |                |           |
|-------------------------------|----------------|-----------|
| <i>An. mangyanu</i>           | Southeast Asia | no colony |
| <i>An. marajoara</i>          | Americas       | no colony |
| <i>An. melas</i>              | Africa         | S         |
| <i>An. merus</i>              | Africa         | S         |
| <i>An. messeae</i>            | Europe         | no colony |
| <i>An. minimus</i>            | Southeast Asia | F/S       |
| <i>An. moucheti</i>           | Africa         | no colony |
| <i>An. multicolor</i>         | Africa         | S         |
| <i>An. nearpunctulatus</i>    | Southeast Asia | no colony |
| <i>An. neivai</i>             | Americas       | no colony |
| <i>An. nemophilous</i>        | Southeast Asia | no colony |
| <i>An. nigerrimus</i>         | South Pacific  | F         |
| <i>An. nili</i>               | Africa         | no colony |
| <i>An. nivipes</i>            | Southeast Asia | F         |
| <i>An. notanandai</i>         | Southeast Asia | no colony |
| <i>An. nuneztovari</i>        | Americas       | no colony |
| <i>An. occidentalis</i>       | Americas       | F         |
| <i>An. pattoni</i>            | Asia           | colonized |
| <i>An. pharoensis</i>         | Africa         | S         |
| <i>An. philippinensis</i>     | South Pacific  | F         |
| <i>An. pseudowillmori</i>     | Southeast Asia | colonized |
| <i>An. psuedopunctipennis</i> | Americas       | F/S       |
| <i>An. pujutensis</i>         | Southeast Asia | no colony |
| <i>An. pulcherrimus</i>       | Asia           | S         |

|                                             |                     |           |
|---------------------------------------------|---------------------|-----------|
| <i>An. punctimacula</i>                     | Americas            | no colony |
| <u><i>An. punctulatus</i></u> <i>ss</i>     | South Pacific       | F         |
| <i>An. diluvialis</i>                       | Americas            | S         |
| <i>An. inundatus</i>                        | Americas            | S         |
| <i>An. maverlius</i>                        | Americas            | S         |
| <i>An. smaragdinus</i>                      | Americas            | S         |
| <i>An. quadriannulatus</i>                  | Africa              | S         |
| <u><i>An. quadrimaculatus</i></u> <i>ss</i> | Americas            | S         |
| <i>An. riparis</i>                          | Southeast Asia      | no colony |
| <u><i>An. sacharovi</i></u>                 | Mediterranean       | F/S       |
| <i>An. sawadwongporni</i>                   | Southeast Asia      | F         |
| <u><i>An. sergentii</i></u>                 | Africa              | F         |
| <u><i>An. sinensis</i></u>                  | Asia                | F/S       |
| <u><i>An. stephensi</i></u>                 | Indian subcontinent | S         |
| <i>An. subpictus</i>                        | Indian subcontinent | S         |
| <i>An. sulawesi</i>                         | Southeast Asia      | no colony |
| <u><i>An. sundiacus</i></u>                 | Indian subcontinent | colonized |
| <u><i>An. superpictus</i></u>               | Mediterranean       | colonized |
| <i>An. takasagoensis</i>                    | Asia                | colonized |
| <i>An. tessellates</i>                      | Indian subcontinent | colonized |
| <i>An. triannulatus</i>                     | Americas            | no colony |
| <i>An. varuna</i>                           | Indian subcontinent | no colony |
| <i>An. whartoni</i>                         | Southeast Asia      | no colony |
| <i>An. willmori</i>                         | Southeast Asia      | colonized |

<sup>1</sup> S-stenogamous, F-forced copulation, 'colonized' indicates a colony was established but no data regarding mating. All references are available upon request.
